# Supplementary material for: Perspectives on West Africa Ebola Virus Disease Outbreak, 2013–2016
Source: PubMed Central journal article supplement (PMC4880067; doi:10.3201/eid2206.160021), 2016-06
Supplement: 16-0021-Techapp-s1.pdf [file 16-0021-Techapp-s1.pdf]

# Perspectives on West Africa Ebola Virus Disease Outbreak, 2013–2016

## Technical Appendix

### Additional References

41. Smith DH, Johnson BK, Isaacson M, Swanapoel R, Johnson KM, Killey M, et al. Marburg-virus disease in Kenya. *Lancet*. 1982;1:816–20 [http://dx.doi.org/10.1016/S0140-6736\(82\)91871-2](http://dx.doi.org/10.1016/S0140-6736(82)91871-2). [PubMed](#)
42. Christie A, Davies-Wayne GJ, Cordier-Lassalle T, Blackley DJ, Laney AS, Williams DE, et al.; Centers for Disease Control and Prevention (CDC). Possible sexual transmission of Ebola virus - Liberia, 2015. *MMWR Morb Mortal Wkly Rep*. 2015;64:479–81. Erratum in: *MMWR Morb Mortal Wkly Rep*. 2015;64:1180. [PubMed](#)
43. Mate SE, Kugelman JR, Nyenswah TG, Ladner JT, Wiley MR, Cordier-Lassalle T, et al. Molecular evidence of sexual transmission of Ebola virus. *N Engl J Med*. 2015;373:2448–54 <http://dx.doi.org/10.1056/NEJMoa1509773>. [PubMed](#)
44. Varkey JB, Shantha JG, Crozier I, Kraft CS, Lyon GM, Mehta AK, et al. Persistence of Ebola virus in ocular fluid during convalescence. *N Engl J Med*. 2015;372:2423–7 <http://dx.doi.org/10.1056/NEJMoa1500306>. [PubMed](#)
45. Deen GF, Knust B, Broutet N, Sesay FR, Formenty P, Ross C, et al. Ebola RNA persistence in semen of Ebola virus disease survivors—preliminary report. [Epub ahead of print]. *N Engl J Med*. 2015. **PMID: 26465681**
46. Gulland A. UK nurse who contracted Ebola is readmitted to hospital. *BMJ*. 2016;352:i1134 <http://dx.doi.org/10.1136/bmj.i1134>. [PubMed](#)
47. Kibadi K, Mupapa K, Kuvula K, Massamba M, Ndaberey D, Muyembe-Tamfum JJ, et al. Late ophthalmologic manifestations in survivors of the 1995 Ebola virus epidemic in Kikwit, Democratic Republic of the Congo. *J Infect Dis*. 1999;179(Suppl 1):S13–4 <http://dx.doi.org/10.1086/514288>. [PubMed](#)

48. Clark DV, Kibuuka H, Millard M, Wakabi S, Lukwago L, Taylor A, et al. Long-term sequelae after Ebola virus disease in Bundibugyo, Uganda: a retrospective cohort study. *Lancet Infect Dis.* 2015;15:905–12 [http://dx.doi.org/10.1016/S1473-3099\(15\)70152-0](http://dx.doi.org/10.1016/S1473-3099(15)70152-0). [PubMed](#)
49. Bausch DG. Sequelae after Ebola virus disease: even when it's over it's not over. *Lancet Infect Dis.* 2015;15:865–6 [http://dx.doi.org/10.1016/S1473-3099\(15\)70165-9](http://dx.doi.org/10.1016/S1473-3099(15)70165-9). [PubMed](#)
50. De Roo A, Ado B, Rose B, Guimard Y, Fonck K, Colebunders R. Survey among survivors of the 1995 Ebola epidemic in Kikwit, Democratic Republic of Congo: their feelings and experiences. *Trop Med Int Health.* 1998;3:883–5 <http://dx.doi.org/10.1046/j.1365-3156.1998.00322.x>. [PubMed](#)
51. Tambo E, Ugwu EC, Ngogang JY. Need of surveillance response systems to combat Ebola outbreaks and other emerging infectious diseases in African countries. *Infect Dis Poverty.* 2014;3:29 <http://dx.doi.org/10.1186/2049-9957-3-29>. [PubMed](#)
52. Kobayashi M, Beer KD, Bjork A, Chatham-Stephens K, Cherry CC, Arzoaquoi S, et al. Community knowledge, attitudes, and practices regarding Ebola virus disease—five counties, Liberia, September–October, 2014. *MMWR Morb Mortal Wkly Rep.* 2015;64:714–8. [PubMed](#)
53. Kilianski A, Evans NG. Effectively communicating the uncertainties surrounding Ebola virus transmission. *PLoS Pathog.* 2015;11:e1005097 <http://dx.doi.org/10.1371/journal.ppat.1005097>. [PubMed](#)
54. Médecins Sans Frontières. An effective Ebola intervention: the Foya approach [cited 2015 Dec 21]. <http://www.msf.org.uk/an-effective-ebola-intervention-the-foya-approach>
55. Dowell SF, Mukunu R, Ksiazek TG, Khan AS, Rollin PE, Peters CJ. Transmission of Ebola hemorrhagic fever: a study of risk factors in family members, Kikwit, Democratic Republic of the Congo, 1995. *Commission de Lutte contre les Epidémies à Kikwit. J Infect Dis.* 1999;179(Suppl 1):S87–91 <http://dx.doi.org/10.1086/514284>. [PubMed](#)
56. Althaus CL. Ebola superspreading. *Lancet Infect Dis.* 2015;15:507–8 [http://dx.doi.org/10.1016/S1473-3099\(15\)70135-0](http://dx.doi.org/10.1016/S1473-3099(15)70135-0). [PubMed](#)
57. Maganga GD, Kapetshi J, Berthet N, Kebela Ilunga B, Kabange F, Mbala Kingebeni P, et al. Ebola virus disease in the Democratic Republic of Congo. *N Engl J Med.* 2014;371:2083–91 <http://dx.doi.org/10.1056/NEJMoa1411099>. [PubMed](#)

58. Volz E, Pond S. Phylodynamic analysis of Ebola virus in the 2014 Sierra Leone epidemic.  
PLoS Curr. 2014;6. pii: ecurrents.outbreaks.6f7025f1271821d4c815385b08f5f80e.  
**PMID: 25914858**
